---

Corrigendum

## **annoPeak: a web application to annotate and visualize peaks from ChIP-seq/ChIP-exo-seq**

**Xing Tang, Arunima Srivastava, Huayang Liu, Raghu Machiraju, Kun Huang, Gustavo Leone**

---

*Bioinformatics*, Volume 33, Issue 10, 15 May 2017, Pages 1570–1571, <https://doi.org/10.1093/bioinformatics/btx016>

available at: <https://apps.medgen.iupui.edu/rsc/content/19/>. The paper has been updated online.

The author would like to inform readers that the URL provided for annoPeak in the above paper has changed. The web service is now
